# Supplementary material for: Molecular dissection of a natural transposable element invasion
Source: PubMed Central journal article supplement — Genome Res. 2018 Jun;28(6):824–35. doi: 10.1101/gr.228627.117 (PMC5991514; doi:10.1101/gr.228627.117), 2018-06
Supplement: supp_gr.228627.117_Supplementary_Fig_S1.pdf [file supp_gr.228627.117_Supplementary_Fig_S1.pdf]

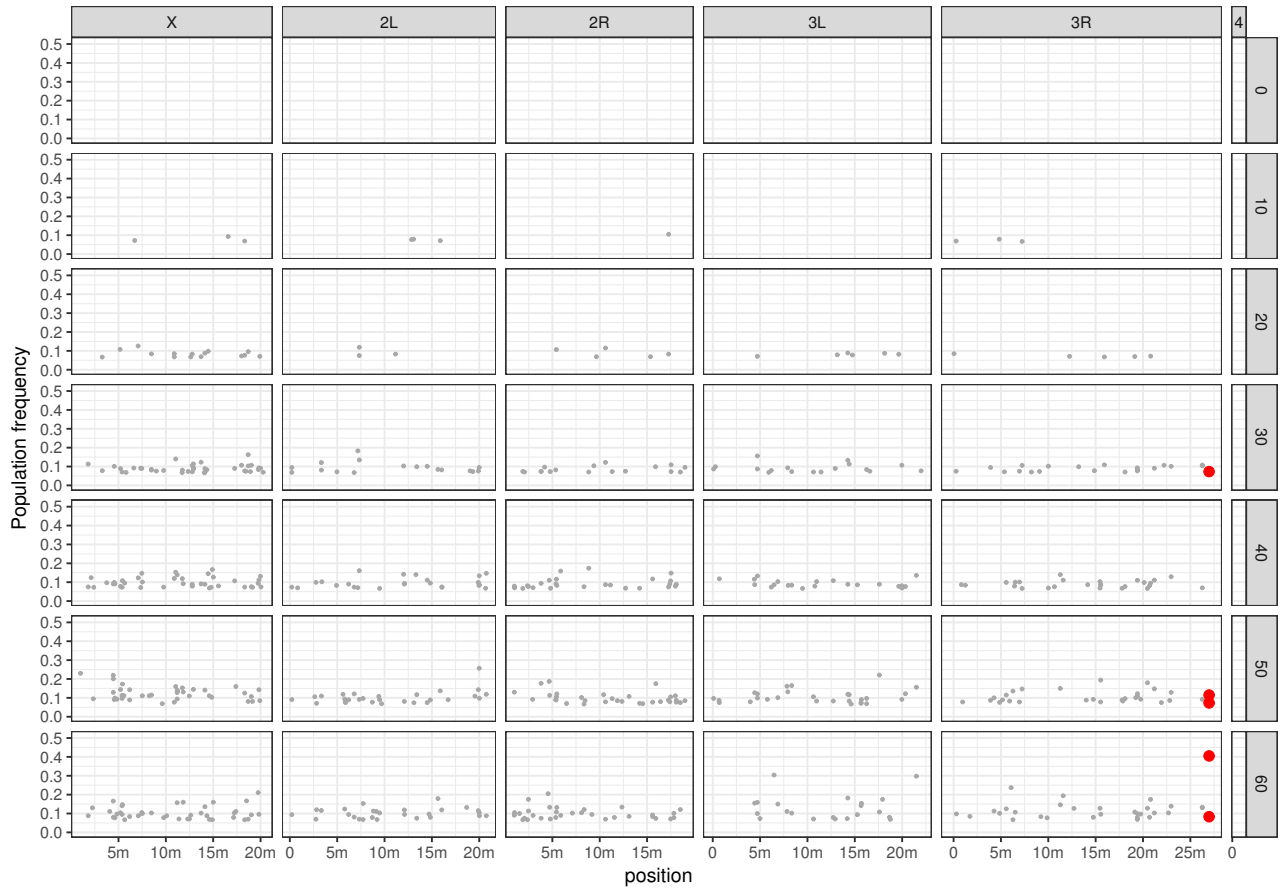

Supplementary Fig. 1: P-element invasion in hot replicate 1. Positions and population frequencies of P-element insertions are shown during the invasion (generations are in the right panel). P-element insertions in piRNA-clusters are shown red. We subsampled the physical coverage to 15 to allow an unbiased comparison of TE abundance between samples. m: million base pairs
