# Supplementary material for: Molecular dissection of a natural transposable element invasion
Source: PubMed Central journal article supplement — Genome Res. 2018 Jun;28(6):824–35. doi: 10.1101/gr.228627.117 (PMC5991514; doi:10.1101/gr.228627.117), 2018-06
Supplement: supp_gr.228627.117_Supplementary_Fig_S7.pdf [file supp_gr.228627.117_Supplementary_Fig_S7.pdf]

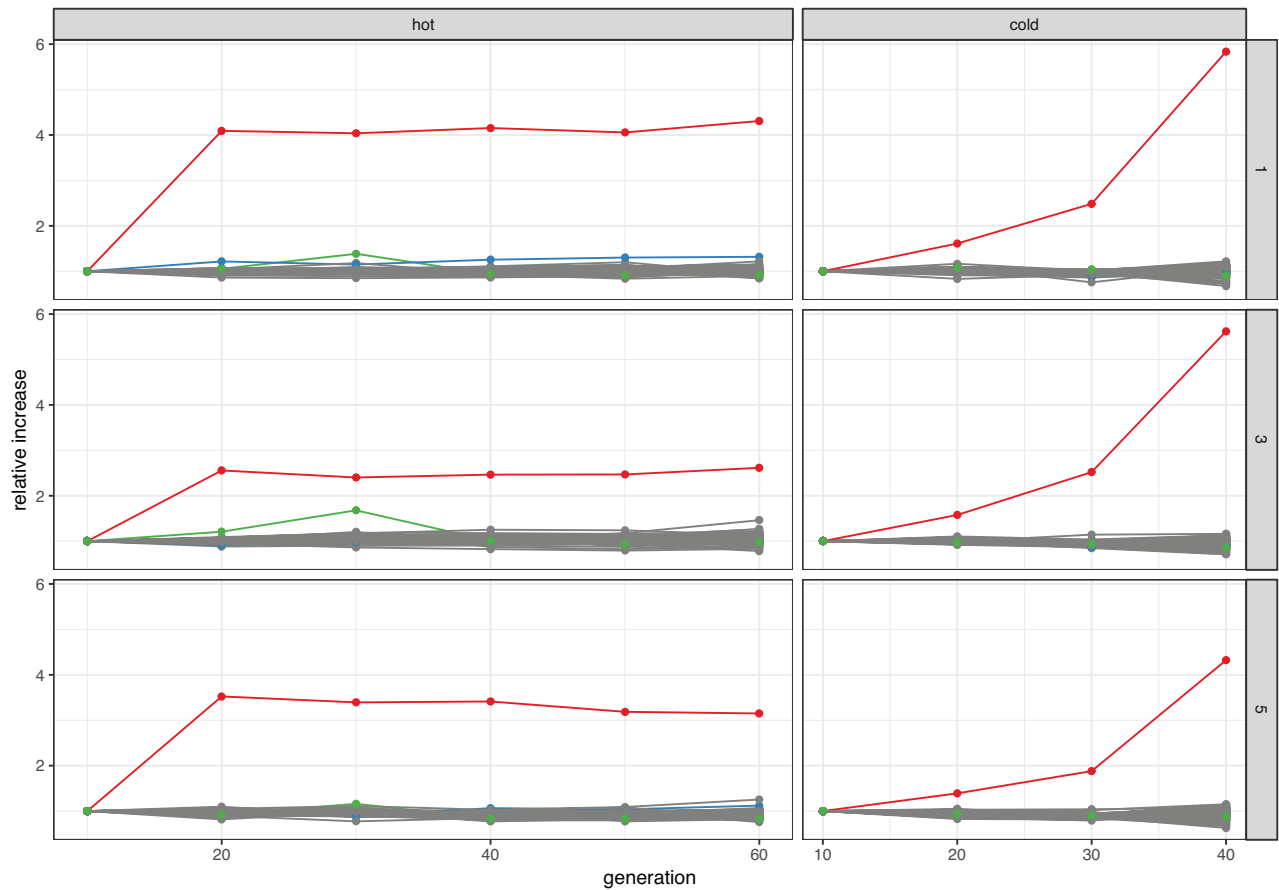

Supplementary Fig. 7: Abundance of 121 TE families (23 TIR, 60 LTR, 37 non-LTR and 1 Foldback) during the hot and cold invasion. Graphs show the fold-increase in reads mapping to each TE family relative to generation 10 (the base population consists solely of females whereas the evolved populations are a mix of males and females, which precludes a comparison of these two datasets). Results are shown for all three replicates (right panel) and two temperature regimes (top panel). Only the P-element (red) shows a pronounced increase in copy numbers; blue: mariner, green: BS
