# Supplementary material for: Molecular dissection of a natural transposable element invasion
Source: PubMed Central journal article supplement — Genome Res. 2018 Jun;28(6):824–35. doi: 10.1101/gr.228627.117 (PMC5991514; doi:10.1101/gr.228627.117), 2018-06
Supplement: supp_gr.228627.117_Supplementary_Fig_S11.pdf [file supp_gr.228627.117_Supplementary_Fig_S11.pdf]

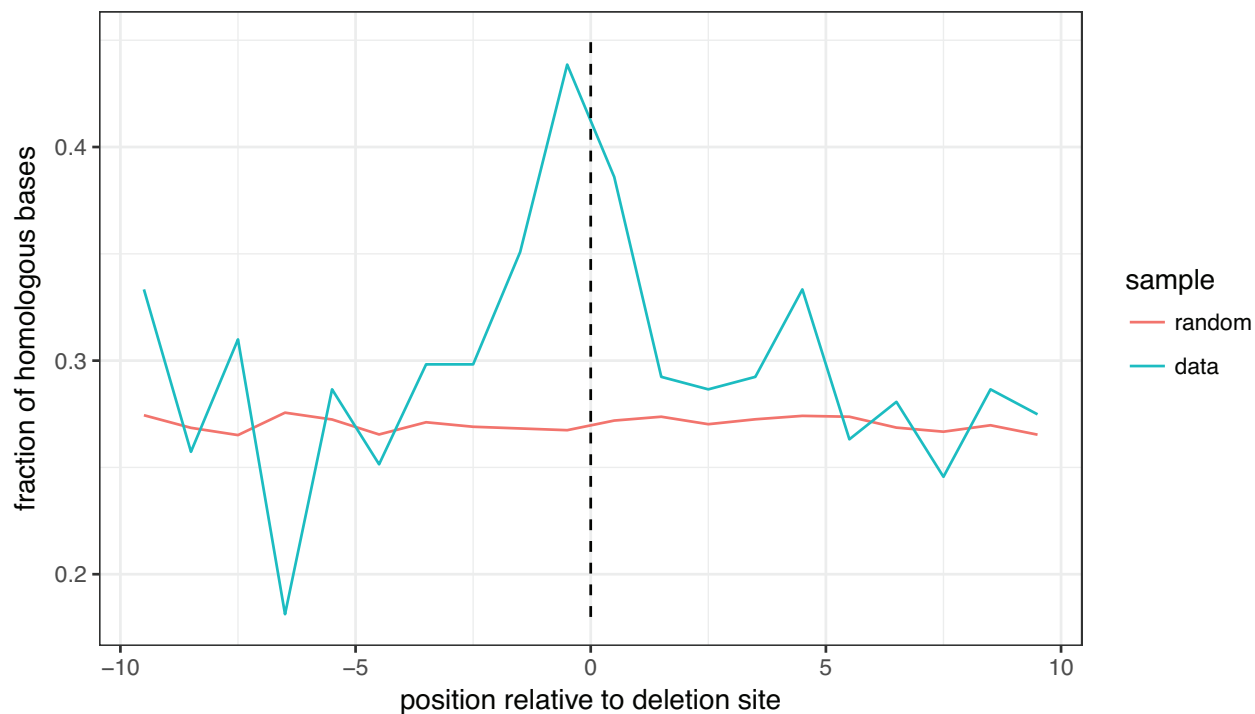

Supplementary Fig. 11: Microhomology around breakpoints of internal deletions (dashed line). We extracted 10nt up- and downstream of the breakpoints of internal deletions and aligned the sequences from the two breakpoints. The graph shows the average fraction of homologous bases for all internal deletions (data; hot and cold evolved populations) and a set of 10,000 random deletions (random). Note that microhomology extends 2nt up and downstream of deletion breakpoints.
