# Supplementary material for: Molecular dissection of a natural transposable element invasion
Source: PubMed Central journal article supplement — Genome Res. 2018 Jun;28(6):824–35. doi: 10.1101/gr.228627.117 (PMC5991514; doi:10.1101/gr.228627.117), 2018-06
Supplement: supp_gr.228627.117_Supplementary_Fig_S13.pdf [file supp_gr.228627.117_Supplementary_Fig_S13.pdf]

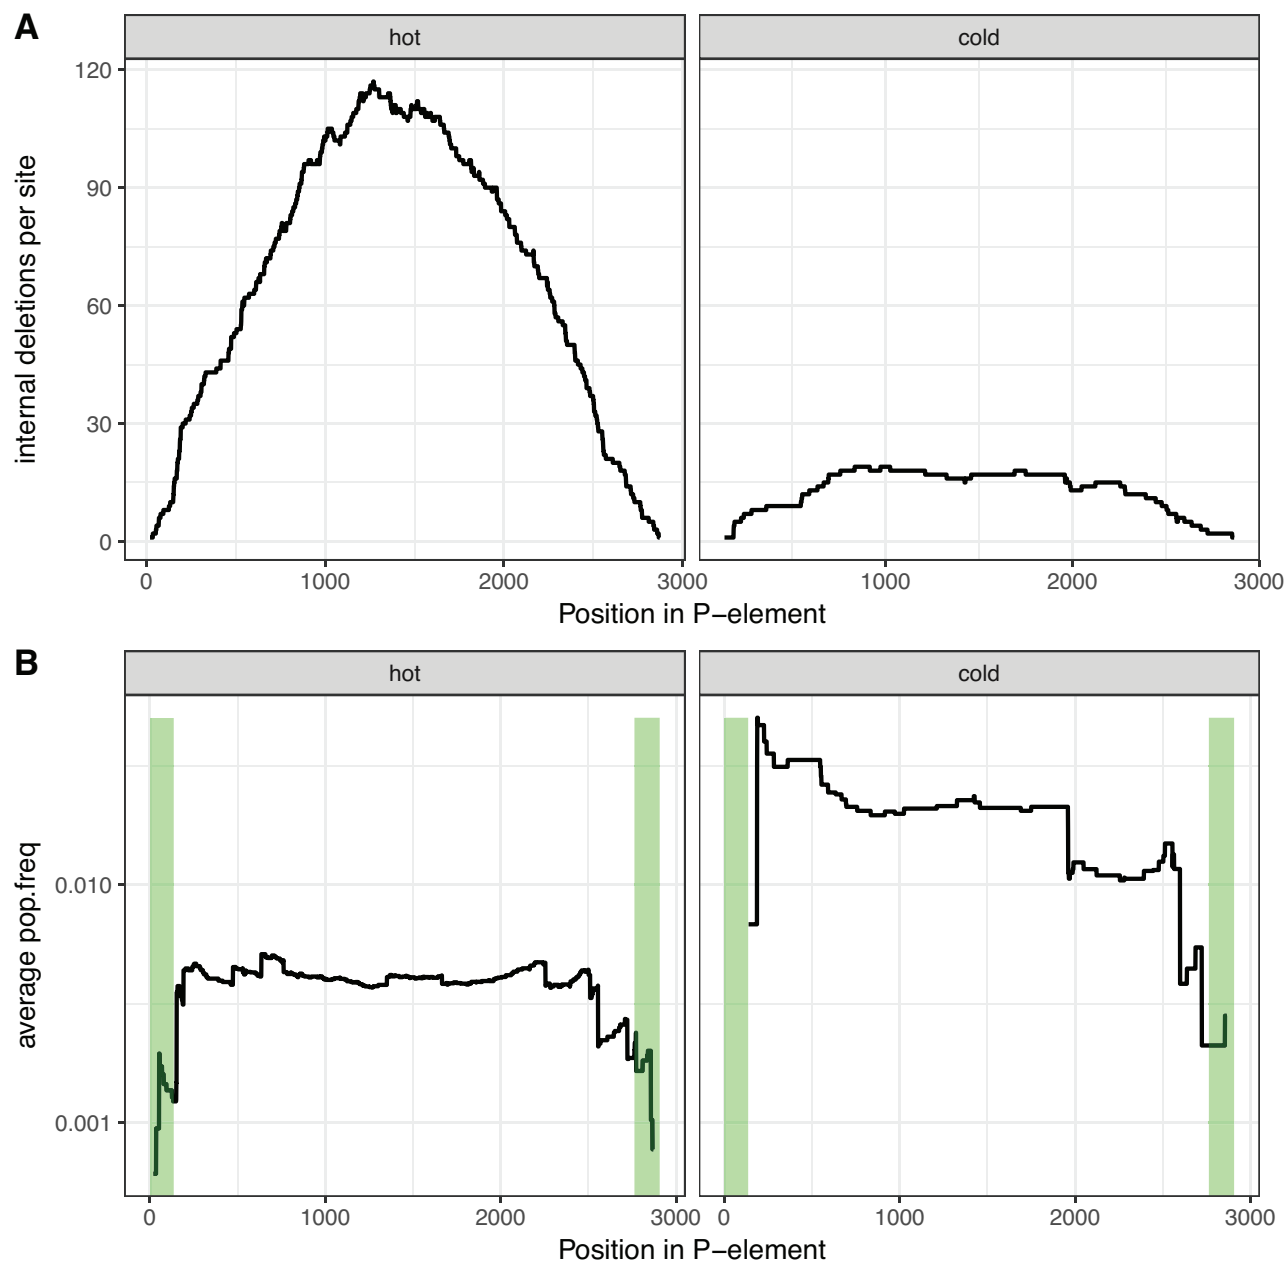

Supplementary Fig. 13: Number of internally deleted P-elements spanning each site (A) and fitness landscape of the P-element (B) for hot and cold conditions.
