# Supplementary material for: Molecular dissection of a natural transposable element invasion
Source: PubMed Central journal article supplement — Genome Res. 2018 Jun;28(6):824–35. doi: 10.1101/gr.228627.117 (PMC5991514; doi:10.1101/gr.228627.117), 2018-06
Supplement: supp_gr.228627.117_Supplementary_Fig_S16.pdf [file supp_gr.228627.117_Supplementary_Fig_S16.pdf]

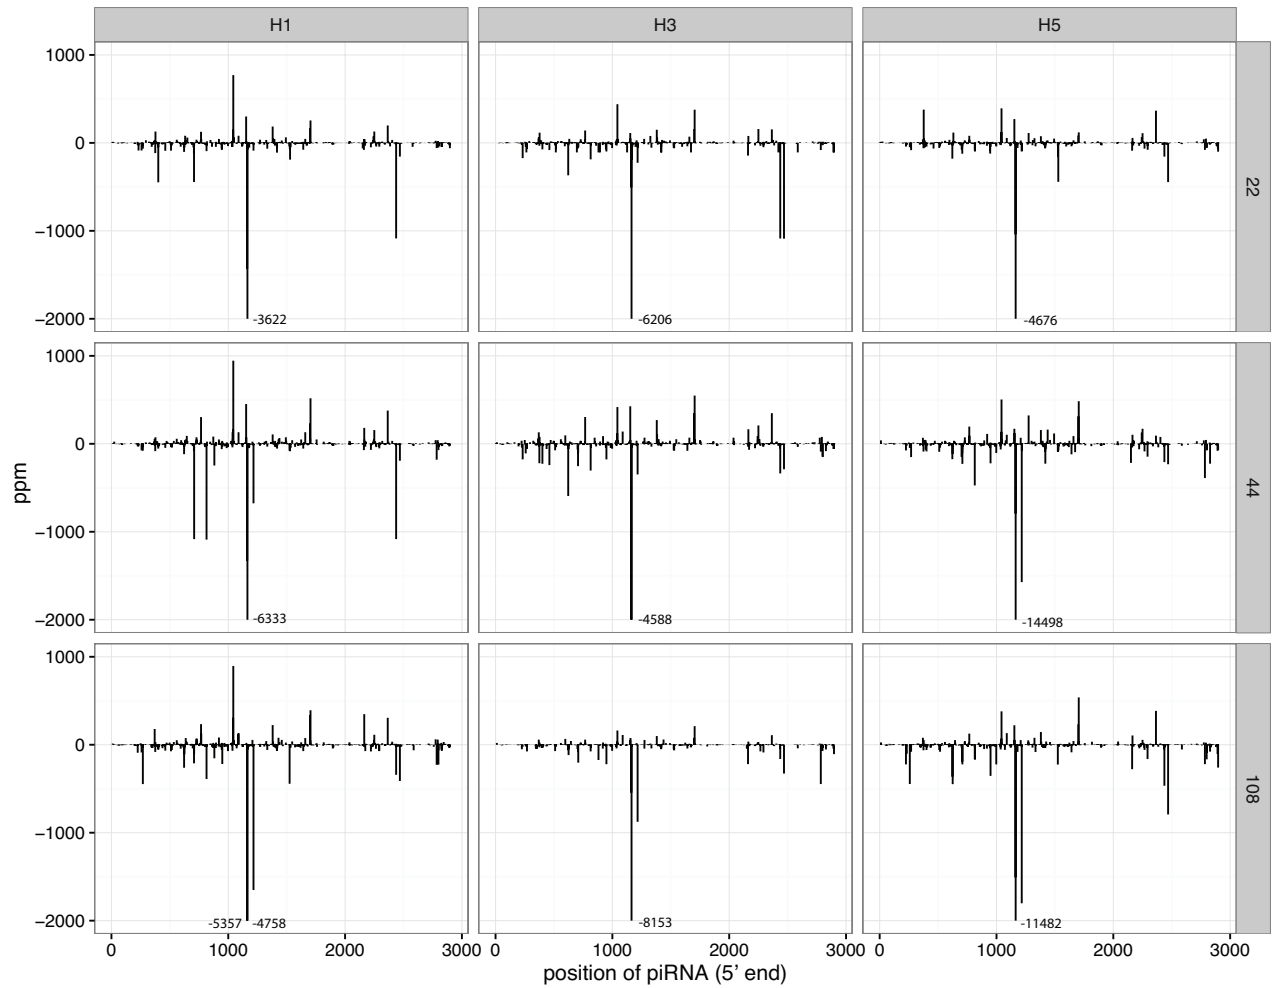

Supplementary Fig. 16: Distribution of piRNAs along the P-element in hot evolved populations. Only the 5' positions of piRNAs are considered and piRNA abundance is normalized to 1 million miRNAs (ppm). Replicates are at the top panel and the generations at the right panel. Sense piRNAs are shown on the positive y-axis and antisense piRNAs on the negative y-axis. The large peaks at positions 1164 and 1162 were truncated (total size is indicated).
