# Supplementary material for: Molecular dissection of a natural transposable element invasion
Source: PubMed Central journal article supplement — Genome Res. 2018 Jun;28(6):824–35. doi: 10.1101/gr.228627.117 (PMC5991514; doi:10.1101/gr.228627.117), 2018-06
Supplement: supp_gr.228627.117_Supplementary_Fig_S19.pdf [file supp_gr.228627.117_Supplementary_Fig_S19.pdf]

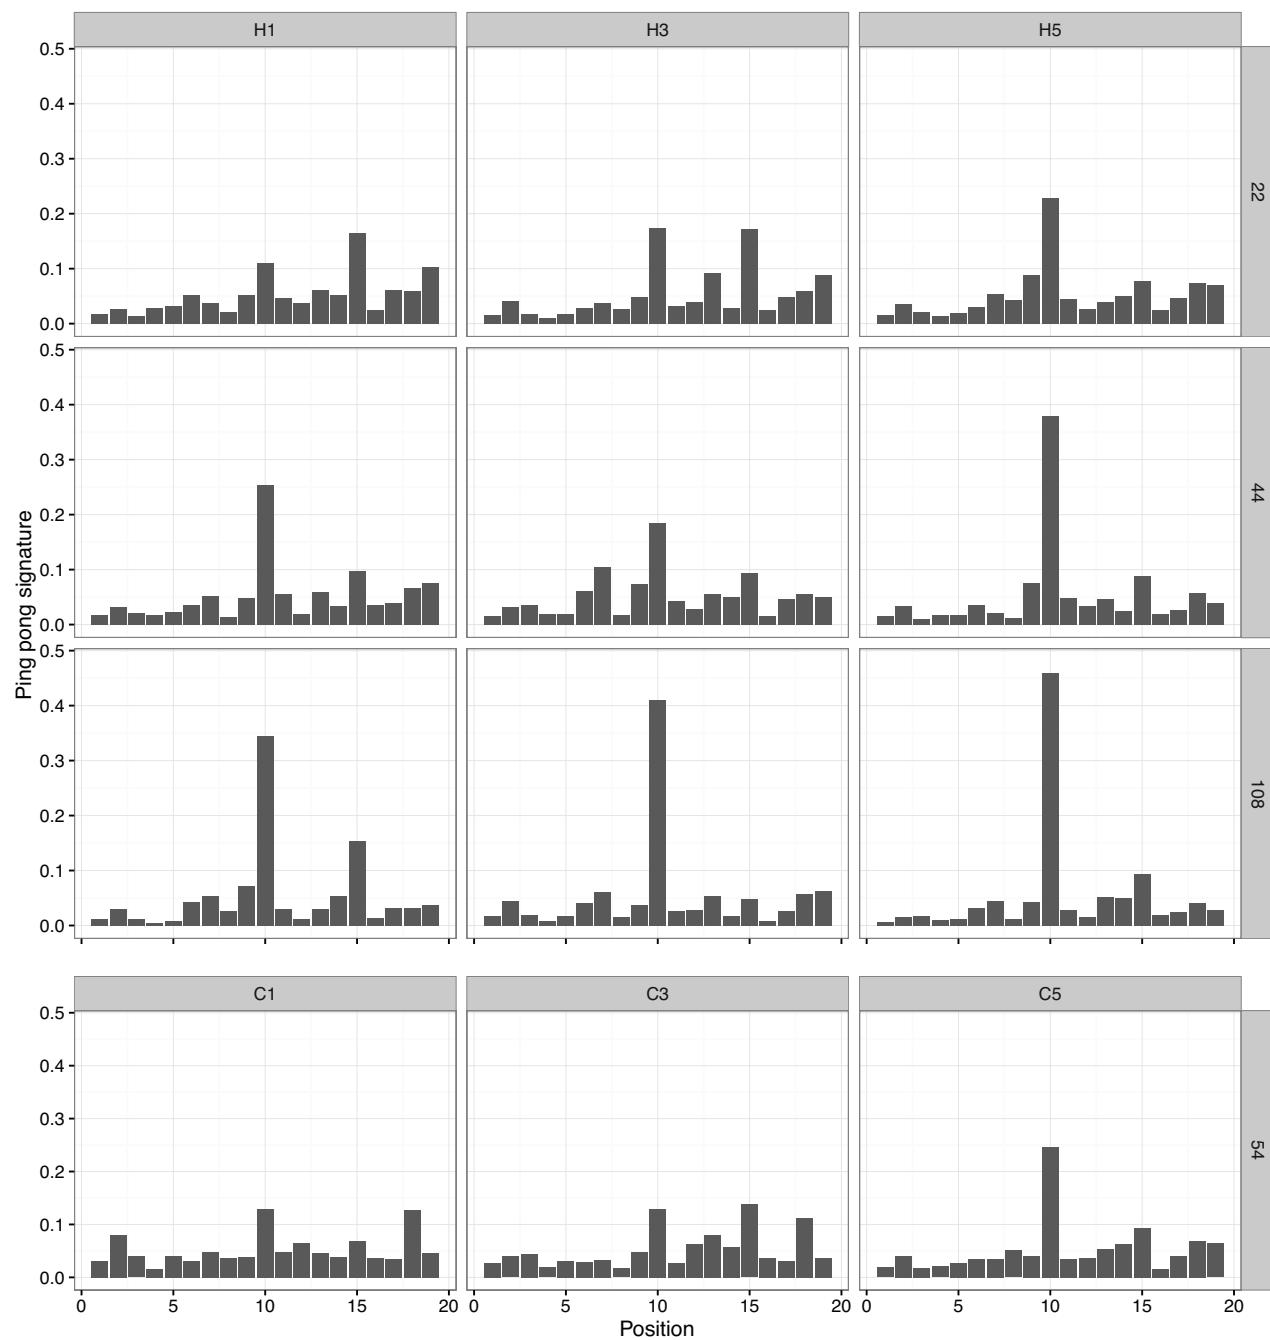

Supplementary Fig. 19: Ping-pong signature of P-element piRNAs in hot and cold evolved populations, excluding piRNAs with a 5' end at positions 1162 and 1164. Labels and data are the same as in fig. 18.
