# Supplementary material for: Molecular dissection of a natural transposable element invasion
Source: PubMed Central journal article supplement — Genome Res. 2018 Jun;28(6):824–35. doi: 10.1101/gr.228627.117 (PMC5991514; doi:10.1101/gr.228627.117), 2018-06
Supplement: supp_gr.228627.117_Supplementary_Results_S1.pdf [file supp_gr.228627.117_Supplementary_Results_S1.pdf]

Supplementary Table 1: P-element polymorphism in hot evolved populations. The coverage (cov) and the fraction of reads supporting the minor allele (%) are provided for all three replicates (rep) during the invasion (generations are at the top). SNPs that occur in more than one replicate are shown in bold. Only SNPs where the minor allele has a minimum count of 20 (summed over all generations) are shown. pos. position of polymorphism within the P-element, refc. reference character [of the *D. simulans* P-element; see Kofler et al. (2015a)], ma. major allele, mi. minor allele

| rep | pos        | refc | ma | mi | 0   |     | 10  |     | 20   |     | 30  |     | 40   |     | 50  |      | 60   |      |
|-----|------------|------|----|----|-----|-----|-----|-----|------|-----|-----|-----|------|-----|-----|------|------|------|
|     |            |      |    |    | cov | %   | cov | %   | cov  | %   | cov | %   | cov  | %   | cov | %    | cov  | %    |
| 1   | 434        | A    | A  | G  | 92  | 0.0 | 133 | 0.8 | 1024 | 2.1 | 727 | 0.7 | 1046 | 0.8 | 519 | 0.2  | 893  | 0.8  |
| 1   | <b>529</b> | A    | A  | G  | 78  | 1.3 | 127 | 1.6 | 944  | 1.8 | 576 | 2.3 | 941  | 2.4 | 423 | 1.4  | 693  | 4.2  |
| 1   | 647        | G    | G  | T  | 69  | 0.0 | 115 | 0.0 | 966  | 1.3 | 527 | 2.5 | 867  | 2.7 | 429 | 1.6  | 646  | 2.3  |
| 1   | 799        | T    | T  | A  | 93  | 0.0 | 155 | 0.6 | 1030 | 0.0 | 661 | 0.2 | 975  | 0.7 | 553 | 0.9  | 869  | 1.0  |
| 1   | 800        | C    | C  | T  | 91  | 0.0 | 150 | 0.7 | 1031 | 0.0 | 660 | 0.2 | 978  | 0.6 | 554 | 0.9  | 876  | 1.1  |
| 1   | 802        | G    | G  | A  | 94  | 0.0 | 153 | 0.7 | 1037 | 0.0 | 649 | 0.2 | 970  | 0.5 | 561 | 0.9  | 879  | 1.1  |
| 1   | 845        | T    | T  | A  | 80  | 0.0 | 121 | 0.0 | 1034 | 0.4 | 611 | 0.7 | 995  | 1.2 | 485 | 1.4  | 818  | 1.5  |
| 1   | 846        | A    | A  | C  | 79  | 0.0 | 122 | 0.0 | 1027 | 0.4 | 616 | 0.6 | 996  | 1.2 | 482 | 1.7  | 798  | 1.5  |
| 1   | 1462       | A    | A  | T  | 69  | 0.0 | 134 | 0.0 | 1015 | 0.3 | 721 | 0.6 | 1007 | 0.8 | 529 | 0.4  | 847  | 0.6  |
| 1   | 2330       | C    | C  | T  | 70  | 0.0 | 137 | 0.0 | 1020 | 0.8 | 722 | 1.4 | 1007 | 2.0 | 512 | 1.6  | 879  | 0.8  |
| 1   | 2557       | G    | G  | A  | 73  | 0.0 | 166 | 1.2 | 1102 | 4.4 | 886 | 2.6 | 1096 | 2.8 | 649 | 4.0  | 1060 | 3.9  |
| 3   | 425        | T    | T  | C  | 120 | 1.7 | 192 | 0.0 | 1074 | 1.2 | 569 | 1.9 | 1053 | 2.2 | 460 | 2.2  | 455  | 2.0  |
| 3   | <b>529</b> | A    | A  | G  | 116 | 0.0 | 164 | 2.4 | 1076 | 3.7 | 501 | 4.8 | 1016 | 3.4 | 459 | 4.1  | 434  | 1.4  |
| 3   | 1667       | A    | A  | T  | 111 | 0.0 | 182 | 0.0 | 1047 | 1.2 | 519 | 2.7 | 993  | 1.6 | 449 | 2.2  | 491  | 3.7  |
| 3   | 1668       | C    | C  | T  | 112 | 0.0 | 186 | 0.0 | 1046 | 1.2 | 522 | 2.7 | 997  | 1.5 | 452 | 2.2  | 498  | 3.8  |
| 3   | 1670       | G    | G  | T  | 115 | 0.0 | 184 | 0.0 | 1050 | 1.2 | 535 | 2.6 | 996  | 1.5 | 455 | 2.2  | 501  | 3.8  |
| 3   | 1671       | A    | A  | T  | 115 | 0.0 | 182 | 0.0 | 1046 | 1.2 | 536 | 2.6 | 998  | 1.5 | 453 | 2.2  | 492  | 3.9  |
| 3   | 1672       | A    | A  | T  | 119 | 0.0 | 184 | 0.0 | 1040 | 1.3 | 542 | 2.6 | 1000 | 1.5 | 462 | 2.2  | 491  | 3.7  |
| 3   | 2242       | A    | A  | G  | 102 | 0.0 | 148 | 0.0 | 1050 | 0.5 | 596 | 1.0 | 1015 | 0.6 | 450 | 0.7  | 447  | 1.3  |
| 3   | 2244       | A    | A  | T  | 103 | 0.0 | 147 | 0.0 | 1074 | 0.5 | 591 | 1.0 | 1022 | 0.7 | 455 | 0.7  | 449  | 1.3  |
| 3   | 2258       | T    | T  | A  | 102 | 0.0 | 152 | 2.6 | 1078 | 3.7 | 632 | 5.9 | 1087 | 7.3 | 460 | 5.4  | 445  | 7.2  |
| 3   | 2259       | C    | C  | T  | 104 | 0.0 | 150 | 2.7 | 1094 | 3.6 | 634 | 6.2 | 1096 | 7.3 | 459 | 5.4  | 444  | 6.5  |
| 3   | 2304       | C    | C  | A  | 116 | 0.0 | 171 | 2.3 | 1082 | 5.1 | 626 | 8.8 | 1060 | 8.8 | 500 | 10.0 | 507  | 12.4 |
| 3   | 2476       | C    | C  | A  | 113 | 0.0 | 160 | 1.9 | 1088 | 5.1 | 642 | 7.3 | 1106 | 8.4 | 526 | 8.4  | 508  | 9.1  |
| 5   | 705        | T    | T  | A  | 146 | 0.0 | 213 | 0.0 | 1075 | 0.7 | 385 | 1.0 | 886  | 0.8 | 597 | 1.0  | 466  | 0.2  |
| 5   | 708        | T    | T  | A  | 149 | 0.0 | 213 | 0.0 | 1077 | 0.6 | 401 | 1.0 | 899  | 0.9 | 611 | 1.1  | 474  | 0.2  |
| 5   | 2283       | G    | G  | A  | 143 | 0.0 | 283 | 0.0 | 1078 | 0.6 | 418 | 1.0 | 1005 | 0.8 | 678 | 0.9  | 585  | 0.2  |
| 5   | 2284       | T    | T  | A  | 141 | 0.0 | 283 | 0.0 | 1072 | 0.7 | 421 | 1.0 | 1007 | 0.8 | 676 | 1.0  | 590  | 0.2  |
| 5   | 2692       | T    | T  | C  | 146 | 0.0 | 255 | 0.0 | 1108 | 0.2 | 483 | 0.8 | 1015 | 1.0 | 700 | 0.4  | 576  | 0.3  |

## Supplementary results 1; Variation with the P-element

As base substitutions within a TE can alter the activity and the invasion dynamics of a TE (Beall et al., 2002; Robillard et al., 2016) we investigated the segregating sites within the P-element under both conditions. The P-element in our experimental populations has the same sequence as the *D. simulans* P-element (Kofler et al., 2015a) (supplementary tables 1, 2). Only few base substitutions emerged during the experiment (supplementary tables 1,2). Hence the sequence of the P-element did not evolve during the invasion.

Supplementary Table 2: P-element polymorphism in the cold evolved populations. The coverage (cov) and the fraction of reads supporting the minor allele (%) are provided for all three replicates (rep) during the invasion (generations are at the top). SNPs that occur in more than one replicate are shown in bold. The high concordance between replicate 1 and 3 is due to alignment problems next to breakpoints of internally deleted P-elements being present in both replicates (SNPs at positions 361, 1960, 1964, 1965, 1966, 1967, 2599, and 2601 were visually inspected in IGV). Only SNPs where the minor allele has a minimum count of 5 (sum over all generations) are shown. pos. position of polymorphism within the P-element, refc. reference character [of the *D. simulans* P-element; see Kofler et al. (2015a)], ma. major allele, mi. minor allele

| rep | pos         | refc | ma | mi | 0   |     | 10  |     | 20  |     | 30  |     | 40  |      |
|-----|-------------|------|----|----|-----|-----|-----|-----|-----|-----|-----|-----|-----|------|
|     |             |      |    |    | cov | %    |
| 1   | <b>361</b>  | C    | C  | A  | 79  | 0.0 | 48  | 2.1 | 85  | 2.4 | 92  | 3.3 | 113 | 1.8  |
| 1   | 529         | A    | A  | G  | 78  | 1.3 | 50  | 8.0 | 82  | 7.3 | 86  | 7.0 | 132 | 8.3  |
| 1   | <b>1960</b> | T    | T  | C  | 73  | 0.0 | 51  | 0.0 | 89  | 2.2 | 99  | 3.0 | 142 | 4.9  |
| 1   | <b>1964</b> | A    | A  | G  | 75  | 0.0 | 51  | 0.0 | 99  | 7.1 | 105 | 5.7 | 161 | 12.4 |
| 1   | <b>1965</b> | G    | G  | C  | 74  | 0.0 | 50  | 0.0 | 98  | 7.1 | 105 | 6.7 | 165 | 11.5 |
| 1   | <b>1966</b> | A    | A  | T  | 75  | 0.0 | 48  | 0.0 | 97  | 7.2 | 105 | 6.7 | 164 | 11.0 |
| 1   | <b>1967</b> | A    | A  | G  | 76  | 0.0 | 45  | 0.0 | 99  | 7.1 | 104 | 6.7 | 168 | 11.9 |
| 1   | 2557        | G    | G  | A  | 73  | 0.0 | 55  | 3.6 | 118 | 4.2 | 127 | 3.9 | 215 | 2.8  |
| 1   | <b>2599</b> | T    | T  | C  | 63  | 0.0 | 51  | 2.0 | 109 | 1.8 | 116 | 2.6 | 222 | 0.9  |
| 1   | <b>2601</b> | T    | T  | C  | 63  | 0.0 | 51  | 2.0 | 112 | 1.8 | 115 | 2.6 | 218 | 0.9  |
| 3   | <b>361</b>  | C    | C  | A  | 106 | 0.0 | 90  | 0.0 | 93  | 3.2 | 195 | 2.1 | 442 | 7.7  |
| 3   | 434         | A    | A  | G  | 130 | 0.0 | 74  | 1.4 | 103 | 2.9 | 169 | 1.2 | 450 | 1.6  |
| 3   | <b>1960</b> | T    | T  | C  | 117 | 0.0 | 94  | 2.1 | 72  | 2.8 | 185 | 4.9 | 530 | 11.7 |
| 3   | <b>1964</b> | A    | A  | G  | 121 | 0.0 | 96  | 3.1 | 72  | 6.9 | 192 | 7.8 | 639 | 21.1 |
| 3   | <b>1965</b> | G    | G  | C  | 119 | 0.0 | 93  | 3.2 | 70  | 7.1 | 187 | 7.5 | 634 | 21.0 |
| 3   | <b>1966</b> | A    | A  | T  | 121 | 0.0 | 94  | 3.2 | 71  | 7.0 | 195 | 7.7 | 641 | 20.7 |
| 3   | <b>1967</b> | A    | A  | G  | 121 | 0.0 | 93  | 3.2 | 73  | 6.8 | 198 | 8.1 | 645 | 21.2 |
| 3   | <b>2599</b> | T    | T  | C  | 95  | 0.0 | 96  | 0.0 | 95  | 3.2 | 215 | 2.3 | 749 | 4.4  |
| 3   | <b>2601</b> | T    | T  | C  | 92  | 0.0 | 99  | 0.0 | 97  | 3.1 | 219 | 1.8 | 774 | 4.3  |
| 5   | 425         | T    | T  | C  | 149 | 3.4 | 51  | 0.0 | 49  | 0.0 | 89  | 0.0 | 116 | 0.0  |
