# Supplementary material for: Molecular dissection of a natural transposable element invasion
Source: PubMed Central journal article supplement — Genome Res. 2018 Jun;28(6):824–35. doi: 10.1101/gr.228627.117 (PMC5991514; doi:10.1101/gr.228627.117), 2018-06
Supplement: supp_gr.228627.117_Supplementary_Table_S1.pdf [file supp_gr.228627.117_Supplementary_Table_S1.pdf]

Supplementary Table 1: P-element abundance in the experimental populations. The abundance was estimated as fraction of reads mapping to the P-element (in reads per million: rpm). Samples consisted either of mixes of males and females (sex: fm) or solely of females (sex: f). As P-element abundance differs between males and females ( $females/male = 1.132$ ; supplementary table 2) we corrected the P-element abundance (rpm corr.:  $fm_{corr} = (f + f/1.132)/2$ ) in samples where only females were used. t.: temperature regime (hot or cold); rep.: replicate; gen.: generation; reads: total number of reads mapping to the P-element; rpm: P-element abundance in reads per million; u' effective transposition rate (estimated from rpm corr:  $u' = (t_n/t_{n-1})^{(1/10)} - 1$ )

| t.   | rep. | gen. | sex | reads | rpm    | rpm corr. | u'      |
|------|------|------|-----|-------|--------|-----------|---------|
| hot  | 1    | 0    | f   | 2363  | 16.98  | 15.99     | na      |
| hot  | 1    | 10   | fm  | 4390  | 69.54  | 69.54     | 0.1586  |
| hot  | 1    | 20   | fm  | 46805 | 284.48 | 284.48    | 0.1513  |
| hot  | 1    | 30   | fm  | 21287 | 280.74 | 280.74    | -0.0013 |
| hot  | 1    | 40   | fm  | 32070 | 288.79 | 288.79    | 0.0028  |
| hot  | 1    | 50   | fm  | 15551 | 282.00 | 282.00    | -0.0024 |
| hot  | 1    | 60   | fm  | 26823 | 299.56 | 299.56    | 0.0061  |
| hot  | 3    | 0    | f   | 3130  | 15.72  | 14.80     | na      |
| hot  | 3    | 10   | fm  | 5017  | 100.61 | 100.61    | 0.2115  |
| hot  | 3    | 20   | fm  | 40777 | 257.24 | 257.24    | 0.0984  |
| hot  | 3    | 30   | fm  | 16352 | 241.68 | 241.68    | -0.0062 |
| hot  | 3    | 40   | fm  | 35415 | 248.02 | 248.02    | 0.0026  |
| hot  | 3    | 50   | fm  | 13931 | 248.42 | 248.42    | 0.0002  |
| hot  | 3    | 60   | fm  | 13528 | 263.10 | 263.10    | 0.0058  |
| hot  | 5    | 0    | f   | 4252  | 18.50  | 17.42     | na      |
| hot  | 5    | 10   | fm  | 7343  | 88.67  | 88.67     | 0.1770  |
| hot  | 5    | 20   | fm  | 45969 | 312.47 | 312.47    | 0.1342  |
| hot  | 5    | 30   | fm  | 12395 | 300.92 | 300.92    | -0.0038 |
| hot  | 5    | 40   | fm  | 28617 | 302.61 | 302.61    | 0.0006  |
| hot  | 5    | 50   | fm  | 19349 | 282.47 | 282.47    | -0.0069 |
| hot  | 5    | 60   | fm  | 16281 | 279.22 | 279.22    | -0.0012 |
| cold | 1    | 0    | f   | 2363  | 16.98  | 15.99     | na      |
| cold | 1    | 10   | fm  | 1461  | 22.38  | 22.38     | 0.0344  |
| cold | 1    | 20   | fm  | 2889  | 36.04  | 36.04     | 0.0488  |
| cold | 1    | 30   | fm  | 3003  | 55.61  | 55.61     | 0.0443  |
| cold | 1    | 40   | fm  | 2588  | 130.56 | 130.56    | 0.0891  |
| cold | 3    | 0    | f   | 3130  | 15.72  | 14.80     | na      |
| cold | 3    | 10   | fm  | 2701  | 35.45  | 35.45     | 0.0915  |
| cold | 3    | 20   | fm  | 2634  | 55.90  | 55.90     | 0.0466  |
| cold | 3    | 30   | fm  | 5438  | 89.35  | 89.35     | 0.0480  |
| cold | 3    | 40   | fm  | 4518  | 199.19 | 199.19    | 0.0835  |
| cold | 5    | 0    | f   | 4252  | 18.50  | 17.42     | na      |
| cold | 5    | 10   | fm  | 1548  | 24.16  | 24.16     | 0.0335  |
| cold | 5    | 20   | fm  | 1545  | 33.60  | 33.60     | 0.0335  |
| cold | 5    | 30   | fm  | 2801  | 45.41  | 45.41     | 0.0306  |
| cold | 5    | 40   | fm  | 2113  | 104.43 | 104.43    | 0.0868  |
