# Supplementary material for: Molecular dissection of a natural transposable element invasion
Source: PubMed Central journal article supplement — Genome Res. 2018 Jun;28(6):824–35. doi: 10.1101/gr.228627.117 (PMC5991514; doi:10.1101/gr.228627.117), 2018-06
Supplement: supp_gr.228627.117_Supplementary_Table_S2.pdf [file supp_gr.228627.117_Supplementary_Table_S2.pdf]

Supplementary Table 2: P-element abundance in males (m) and females (f) at different generations (gen.) of a hot evolved population (replicate 1). The fraction of reads mapping to the P-element (rpm: reads per million mapped reads) and the ratio between the female and the male P-element abundance is provided.

| gen.    | m [rpm] | f [rpm] | ratio |
|---------|---------|---------|-------|
| 1       | 19.2    | 16.2    | 0.844 |
| 7       | 40.8    | 58.1    | 1.424 |
| 16      | 210.3   | 237.0   | 1.127 |
| average |         |         | 1.132 |
