# Supplementary material for: Molecular dissection of a natural transposable element invasion
Source: PubMed Central journal article supplement — Genome Res. 2018 Jun;28(6):824–35. doi: 10.1101/gr.228627.117 (PMC5991514; doi:10.1101/gr.228627.117), 2018-06
Supplement: supp_gr.228627.117_Supplementary_Table_S7.pdf [file supp_gr.228627.117_Supplementary_Table_S7.pdf]

Supplementary Table 7: Top seven transcription factor (TF) binding sites predicted for the P-element using JASPAR (Sandelin et al., 2004)

| TF     | score   | start | end  | strand | predicted sequence   |
|--------|---------|-------|------|--------|----------------------|
| su(Hw) | 15.3222 | 156   | 176  | -      | GCAGCAAATTTGCAATATTT |
| pan    | 14.4269 | 340   | 353  | -      | TCGCCTCCTTTTAA       |
| br     | 14.0363 | 2075  | 2088 | -      | ATAAAAGACAAAAC       |
| ttk    | 13.9888 | 2117  | 2125 | -      | AAGGATAAT            |
| slp1   | 13.9241 | 471   | 481  | -      | TTGTTTACATA          |
| flh    | 13.6307 | 470   | 480  | -      | TGTTTACATAA          |
| slp1   | 13.1297 | 1968  | 1978 | -      | TTGTTTACGCA          |
