# Supplementary material for: Molecular dissection of a natural transposable element invasion
Source: HighWire-hosted journal article supplement (doi:10.1101/gr.228627.117), 2018-04-30
Supplement: Supplementary_Fig_S8.pdf [file Supplementary_Fig_S8.pdf]

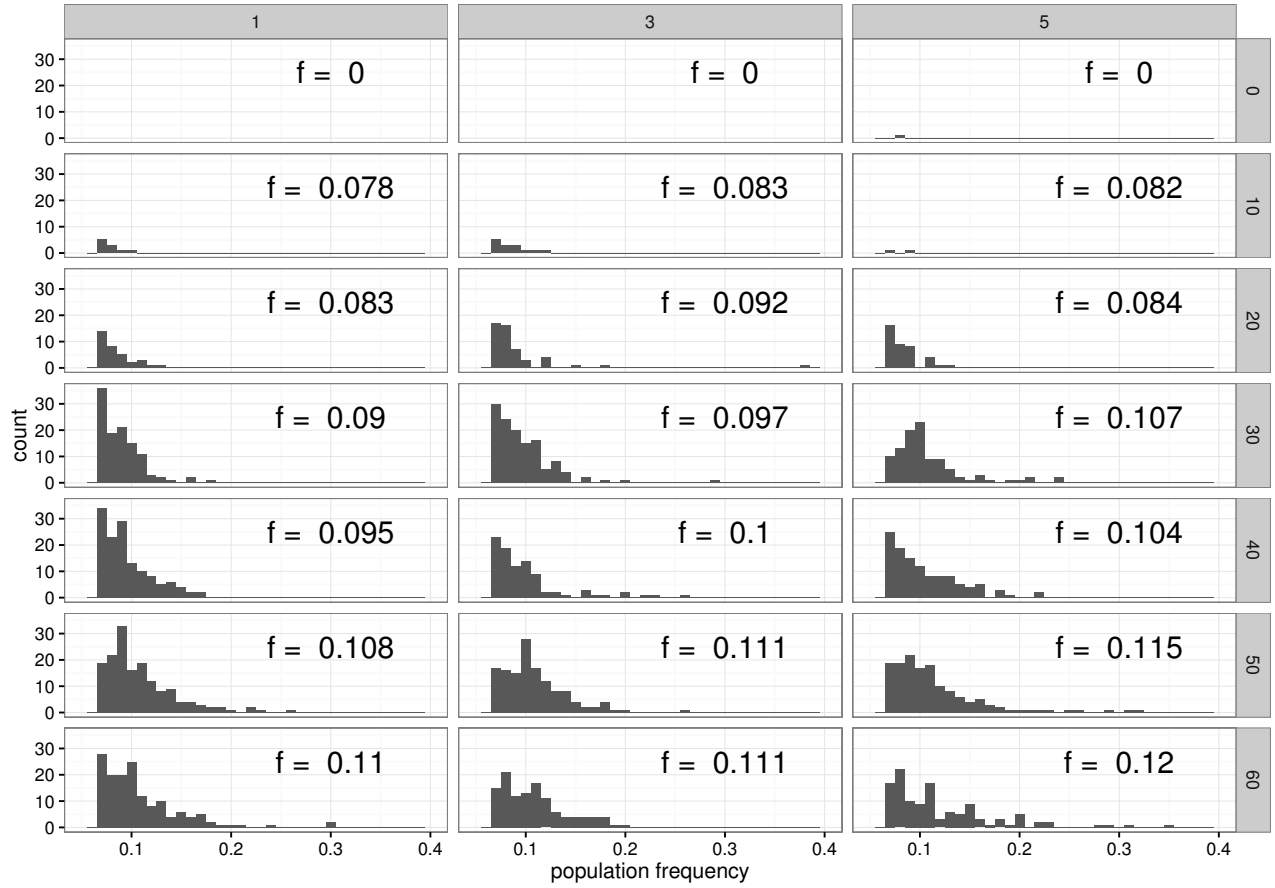

Supplementary Fig. 8: Population frequencies of P-element insertions during the hot invasion. Histograms show the population frequencies of P-element insertions during the invasion. Generations are in the right panel and replicates in the top panel. Note that the average population frequency ( $f$ ) increases during the hot invasion.
