# Supplementary material for: Molecular dissection of a natural transposable element invasion
Source: HighWire-hosted journal article supplement (doi:10.1101/gr.228627.117), 2018-04-30
Supplement: Supplementary_Fig_S9.pdf [file Supplementary_Fig_S9.pdf]

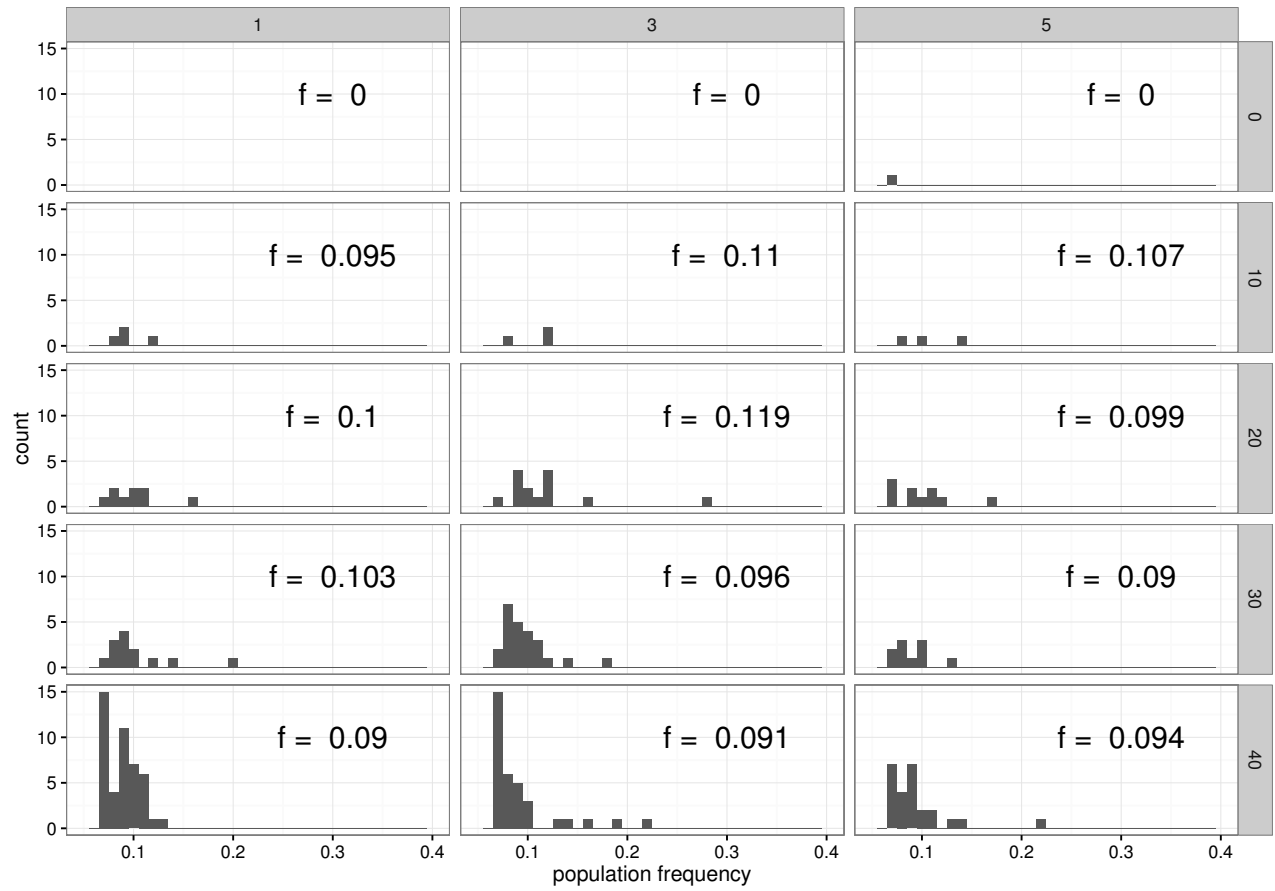

Supplementary Fig. 9: Population frequencies of P-element insertions during the cold invasion. Histograms show the population frequencies of P-element insertions during the invasion. Generations are in the right panel and replicates in the top panel. The average population frequency ( $f$ ) remains rather stable during the cold invasion.
