# Supplementary material for: Molecular dissection of a natural transposable element invasion
Source: HighWire-hosted journal article supplement (doi:10.1101/gr.228627.117), 2018-04-30
Supplement: Supplementary_Fig_S18.pdf [file Supplementary_Fig_S18.pdf]

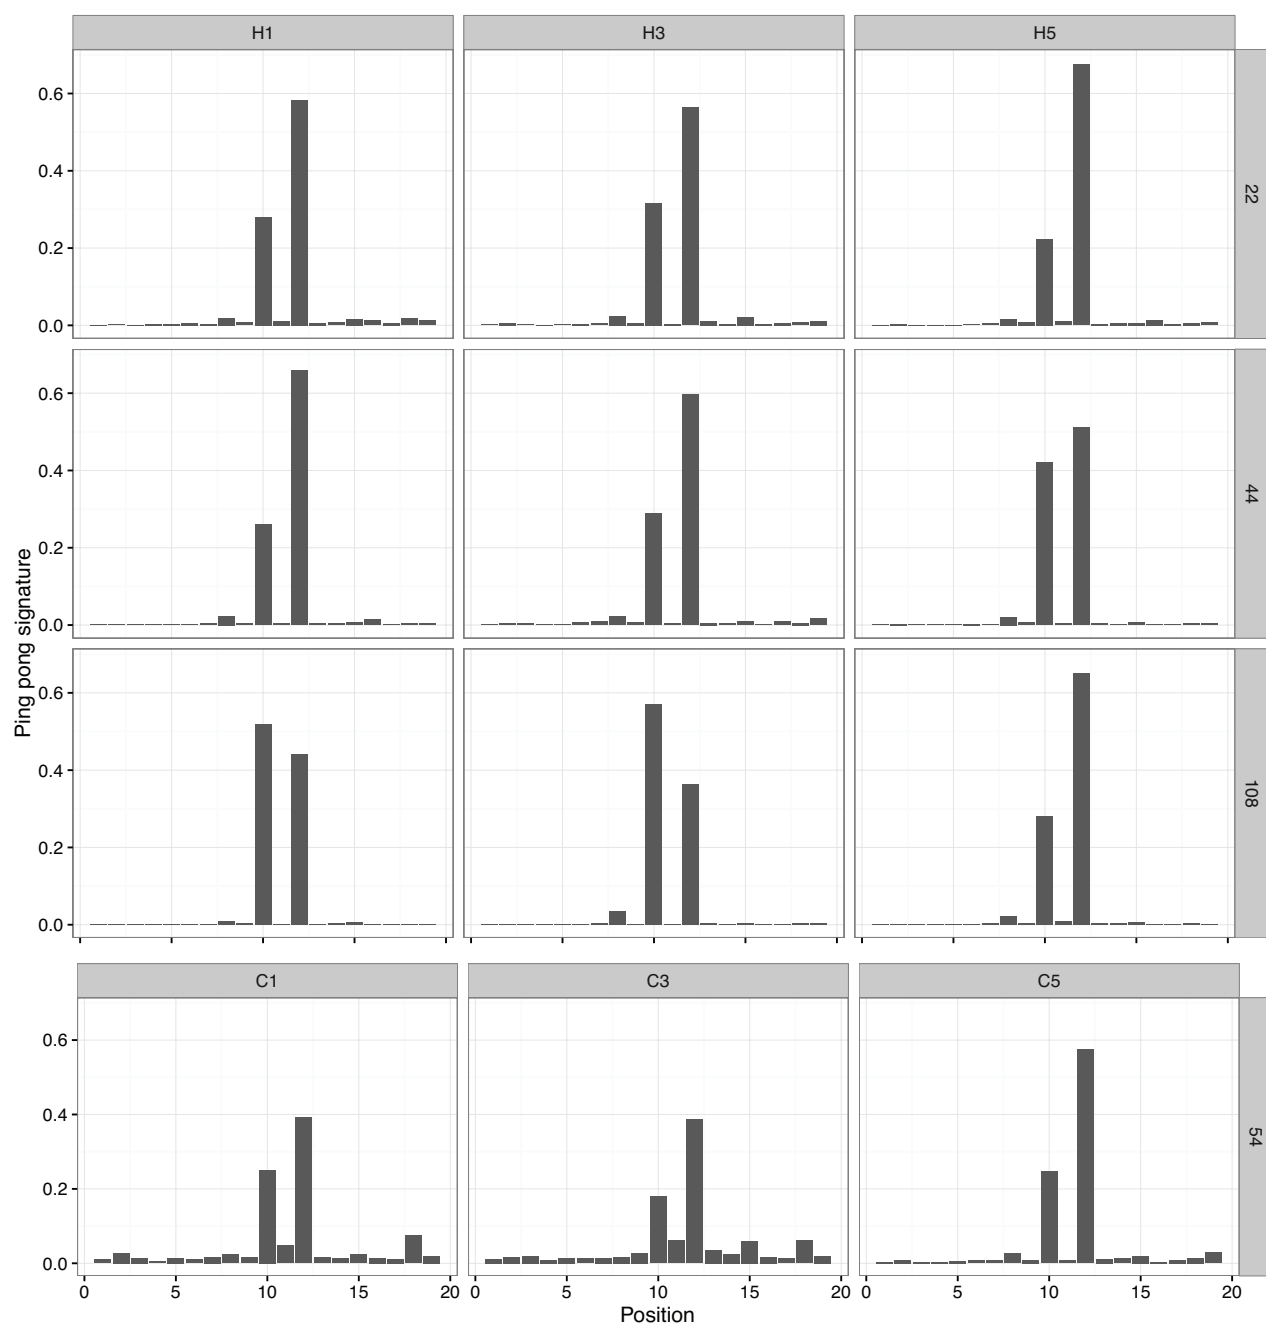

Supplementary Fig. 18: Ping-pong signature of P-element piRNAs in hot and cold evolved populations. Data are shown for all three replicates of the hot (H1, H3 and H5) and cold (C1, C3, C5) evolved populations. Due to a low number of piRNAs we could not compute ping-pong signatures for any replicate of the cold invasion at generation 22.
