# Supplementary material for: Molecular dissection of a natural transposable element invasion
Source: HighWire-hosted journal article supplement (doi:10.1101/gr.228627.117), 2018-04-30
Supplement: Supplementary_Fig_S20.pdf [file Supplementary_Fig_S20.pdf]

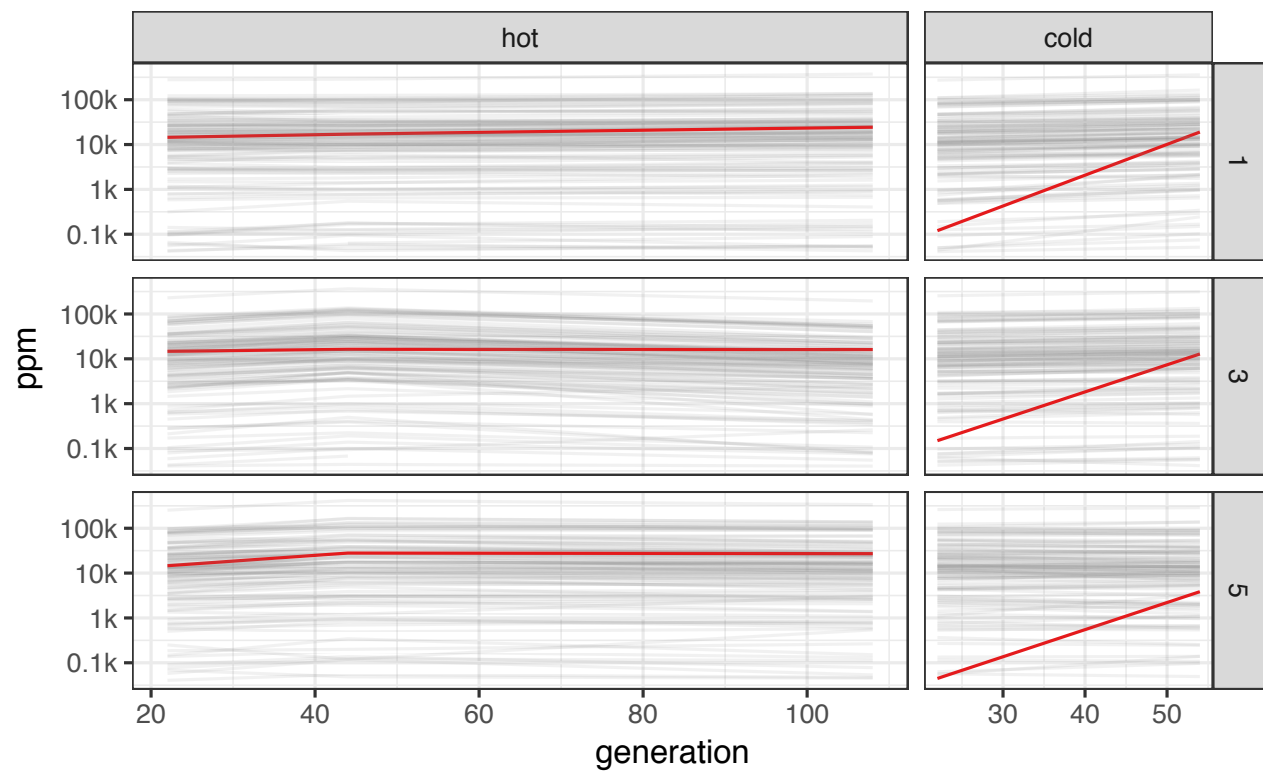

Supplementary Fig. 20: Abundance of piRNAs for 121 TE families (23 TIR, 60 LTR, 37 non-LTR and 1 Foldback) during the hot and the cold invasion. Solely P-element piRNAs (red) show a marked increase at cold conditions. Families with fewer than 40 piRNAs per million miRNAs are not shown.
