# Supplementary material for: Molecular dissection of a natural transposable element invasion
Source: HighWire-hosted journal article supplement (doi:10.1101/gr.228627.117), 2018-04-30
Supplement: Supplementary_Results_S2.pdf [file Supplementary_Results_S2.pdf]

Supplementary Table 1: The P-element has an insertion bias into origin recognition complex (ORC) binding sites in hot evolved populations. For every replicate (rep.) and generation (gen.) we show the total number of P-element insertions (#), the expected (exp.), and the observed (obs.) number of insertions in ORC binding sites as well as the enrichment of P-elements in ORC binding sites ( $enr. = obs./exp.$ ). sig.: significance of enrichment using a chi-squared test; \*  $< 0.05$ , \*\*\*  $< 0.001$

| rep. | gen. | #   | exp. | obs. | enr.  | sig. |
|------|------|-----|------|------|-------|------|
| 1    | 0    | 2   | 0.03 | 0    | 0.00  |      |
| 1    | 10   | 10  | 0.16 | 5    | 31.04 | *    |
| 1    | 20   | 34  | 0.55 | 16   | 29.21 | ***  |
| 1    | 30   | 111 | 1.79 | 46   | 25.73 | ***  |
| 1    | 40   | 136 | 2.19 | 46   | 21.00 | ***  |
| 1    | 50   | 158 | 2.55 | 53   | 20.82 | ***  |
| 1    | 60   | 151 | 2.43 | 59   | 24.26 | ***  |
| 3    | 0    | 2   | 0.03 | 0    | 0.00  |      |
| 3    | 10   | 14  | 0.23 | 6    | 26.60 | *    |
| 3    | 20   | 50  | 0.81 | 18   | 22.35 | ***  |
| 3    | 30   | 127 | 2.05 | 54   | 26.39 | ***  |
| 3    | 40   | 92  | 1.48 | 35   | 23.62 | ***  |
| 3    | 50   | 137 | 2.21 | 66   | 29.91 | ***  |
| 3    | 60   | 118 | 1.90 | 40   | 21.04 | ***  |
| 5    | 0    | 3   | 0.05 | 0    | 0.00  |      |
| 5    | 10   | 2   | 0.03 | 1    | 31.04 |      |
| 5    | 20   | 39  | 0.63 | 16   | 25.47 | ***  |
| 5    | 30   | 102 | 1.64 | 39   | 23.74 | ***  |
| 5    | 40   | 115 | 1.85 | 37   | 19.97 | ***  |
| 5    | 50   | 143 | 2.30 | 52   | 22.57 | ***  |
| 5    | 60   | 119 | 1.92 | 41   | 21.39 | ***  |

## Supplementary results 2; Insertion bias of the P-element

The P-element has a strong insertion bias, with about 30-40% of all insertions occurring in 2-3% of the genome (Bellen et al., 2011). The P-element preferentially transposes into unreplicated regions because of an insertion bias into origin of replication complex (ORC) binding sites (Kofler et al., 2015a; Spradling et al., 2011). We found a strong insertion bias in both hot- and cold-evolved populations, with P-element insertions about 20-30 fold enriched in ORC binding sites (supplementary tables 1, 2). The extent of the bias does not change during the invasion and is similar for the hot- and the cold-evolved populations (supplementary tables 1, 2).

Supplementary Table 2: The P-element has an insertion bias into origin recognition complex (ORC) binding sites in cold evolved populations. For every replicate (rep.) and generation (gen.) we show the total number of P-element insertions (#), the expected (exp.) and the observed (obs.) number of insertions in ORC binding sites as well as the enrichment of P-elements in ORC binding sites ( $enr. = obs./exp.$ ). sig.: significance of enrichment using a chi-squared test; \*  $< 0.05$ , \*\*\*  $< 0.001$

| rep. | gen. | #  | exp. | obs. | enr.  | sig. |
|------|------|----|------|------|-------|------|
| 1    | 0    | 2  | 0.03 | 0    | 0.00  |      |
| 1    | 10   | 4  | 0.06 | 2    | 31.04 |      |
| 1    | 20   | 9  | 0.14 | 5    | 34.49 | *    |
| 1    | 30   | 13 | 0.21 | 4    | 19.10 |      |
| 1    | 40   | 45 | 0.72 | 21   | 28.97 | ***  |
| 3    | 0    | 2  | 0.03 | 0    | 0.00  |      |
| 3    | 10   | 3  | 0.05 | 3    | 62.08 |      |
| 3    | 20   | 14 | 0.23 | 6    | 26.60 | *    |
| 3    | 30   | 24 | 0.39 | 13   | 33.62 | ***  |
| 3    | 40   | 34 | 0.55 | 19   | 34.69 | ***  |
| 5    | 0    | 3  | 0.05 | 0    | 0.00  |      |
| 5    | 10   | 3  | 0.05 | 1    | 20.69 |      |
| 5    | 20   | 10 | 0.16 | 4    | 24.83 |      |
| 5    | 30   | 10 | 0.16 | 4    | 24.83 |      |
| 5    | 40   | 25 | 0.40 | 6    | 14.90 |      |
