# Supplementary material for: Molecular dissection of a natural transposable element invasion
Source: HighWire-hosted journal article supplement (doi:10.1101/gr.228627.117), 2018-04-30
Supplement: Supplementary_Table_S3.pdf [file Supplementary_Table_S3.pdf]

Supplementary Table 3: Detailed overview of the P-element invasion in hot replicate 1. We estimated the abundance of the P-element (rpm: reads per million mapped reads) as well as the effective transposition rate ( $u'$ ) for females ( $f$ ), males ( $m$ ) and a mix of females and males ( $fm$ ). Abundance estimates of the mix of males and females( $fm$ ) are either based on direct estimates (<sup>a</sup>), a correction factor [<sup>b</sup>:  $fm_{corr} = (f + f/1.132)/2$ ; supplementary table 2] or the average between males and females (<sup>c</sup>). gen.: generations

| gen. | $f$   | $m$   | $fm$               | $u$     |
|------|-------|-------|--------------------|---------|
| 0    | 17.0  | -     | 16.0 <sup>b</sup>  | -       |
| 1    | 16.2  | 19.2  | 17.7 <sup>c</sup>  | 0.1086  |
| 4    | -     | -     | 26.3 <sup>a</sup>  | 0.1415  |
| 7    | 58.1  | 40.8  | 49.5 <sup>c</sup>  | 0.2343  |
| 10   | -     | -     | 69.5 <sup>a</sup>  | 0.1203  |
| 13   | -     | -     | 130.4 <sup>a</sup> | 0.2331  |
| 16   | 237.0 | 210.3 | 223.7 <sup>c</sup> | 0.1971  |
| 18   | -     | -     | 293.6 <sup>a</sup> | 0.1457  |
| 20   | -     | -     | 284.5 <sup>a</sup> | -0.0156 |
| 30   | -     | -     | 280.7 <sup>a</sup> | -0.0013 |
