# Supplementary material for: Molecular dissection of a natural transposable element invasion
Source: HighWire-hosted journal article supplement (doi:10.1101/gr.228627.117), 2018-04-30
Supplement: Supplementary_Table_S4.pdf [file Supplementary_Table_S4.pdf]

Supplementary Table 4: Splicing efficiency of the three P-element introns. We sequenced the transcriptome of hot (generation 22) and cold (generation 11) evolved populations (evol.), either reared in a hot or a cold common garden (c.g.). Reads were mapped to the P-element with an algorithm allowing for spliced introns (gsnap) and the number of reads supporting the presence (pres.) and absence (abs.) of a splicing event were counted for 5' and 3' splice junctions (table shows the sum of the two junctions). The percentage of reads supporting splicing of the intron (%) was calculated. rep.: replicates

| evol. | c.g. | rep. | exon 0 - exon 1 |      |      | exon 1 - exon 2 |      |      | exon 2 - exon 3 |      |      |
|-------|------|------|-----------------|------|------|-----------------|------|------|-----------------|------|------|
|       |      |      | pres.           | abs. | %    | pres.           | abs. | %    | pres.           | abs. | %    |
| cold  | cold | 8    | 6               | 1    | 0.86 | 14              | 1    | 0.93 | 0               | 9    | 0.00 |
| cold  | hot  | 8    | 14              | 0    | 1.00 | 12              | 1    | 0.92 | 2               | 21   | 0.09 |
| cold  | cold | 9    | 10              | 2    | 0.83 | 4               | 2    | 0.67 | 0               | 4    | 0.00 |
| cold  | hot  | 9    | 42              | 8    | 0.84 | 18              | 12   | 0.60 | 4               | 30   | 0.12 |
| cold  | cold | 10   | 2               | 0    | 1.00 | 6               | 0    | 1.00 | 0               | 1    | 0.00 |
| cold  | hot  | 10   | 6               | 0    | 1.00 | 4               | 0    | 1.00 | 0               | 4    | 0.00 |
| hot   | cold | 8    | 94              | 11   | 0.90 | 60              | 28   | 0.68 | 0               | 79   | 0.00 |
| hot   | hot  | 8    | 226             | 42   | 0.84 | 118             | 64   | 0.65 | 0               | 199  | 0.00 |
| hot   | cold | 9    | 22              | 14   | 0.61 | 20              | 16   | 0.56 | 0               | 40   | 0.00 |
| hot   | hot  | 9    | 348             | 67   | 0.84 | 206             | 80   | 0.72 | 0               | 323  | 0.00 |
| hot   | cold | 10   | 42              | 23   | 0.65 | 34              | 28   | 0.55 | 0               | 70   | 0.00 |
| hot   | hot  | 10   | 140             | 34   | 0.80 | 96              | 33   | 0.74 | 0               | 142  | 0.00 |
