# Supplementary material for: Molecular dissection of a natural transposable element invasion
Source: HighWire-hosted journal article supplement (doi:10.1101/gr.228627.117), 2018-04-30
Supplement: Supplementary_Table_S6.pdf [file Supplementary_Table_S6.pdf]

Supplementary Table 6: Hybrid dysgenesis in hot and cold evolved populations (hot at generation 114; cold at generation 57); We estimated the number of flies having clearly visible ovarioles (clear), weakly visible ovarioles (weak), and no discernible ovarioles (absent) at three different temperature regimes: constant hot (29°C), cycling hot (28-18°C) and cycling cold (20-10°C). Ovary dissections for each temperature regime (TR) were done on a single day. For constant 29°C we performed two ovary dissections on two successive days (separated by ;). The percentage of dysgenic ovaries (HD) is computed as  $100 * (absent + (weak/2)) / (clear + weak + absent)$

| TR      | Sample | visibility of ovarioles |       |        | HD    |
|---------|--------|-------------------------|-------|--------|-------|
|         |        | clear                   | weak  | absent |       |
| 29°C    | H1     | 161;166                 | 8;4   | 1;0    | 2.06  |
| 29°C    | H3     | 177;145                 | 6;2   | 1;4    | 2.69  |
| 29°C    | H5     | 167;156                 | 15;3  | 5;2    | 4.60  |
| 29°C    | C1     | 149;160                 | 12;6  | 16;18  | 11.91 |
| 29°C    | C3     | 97;144                  | 16;5  | 16;24  | 16.72 |
| 29°C    | C5     | 46;77                   | 10;15 | 67;87  | 55.13 |
| 28-18°C | H1     | 191                     | 2     | 2      | 1.54  |
| 28-18°C | H3     | 187                     | 3     | 0      | 0.79  |
| 28-18°C | H5     | 163                     | 4     | 1      | 1.79  |
| 28-18°C | C1     | 163                     | 10    | 25     | 15.15 |
| 28-18°C | C3     | 162                     | 6     | 18     | 11.29 |
| 28-18°C | C5     | 133                     | 9     | 31     | 20.52 |
| 20-10°C | H1     | 184                     | 1     | 2      | 1.34  |
| 20-10°C | H3     | 182                     | 2     | 3      | 2.14  |
| 20-10°C | H5     | 160                     | 3     | 2      | 2.12  |
| 20-10°C | C1     | 160                     | 2     | 7      | 4.73  |
| 20-10°C | C3     | 177                     | 2     | 3      | 2.20  |
| 20-10°C | C5     | 191                     | 0     | 1      | 0.52  |
