# Supplementary figures and images for: Molecular dissection of a natural transposable element invasion
Source: PubMed Central journal article supplement — Genome Res. 2018 Jun;28(6):824–35. doi: 10.1101/gr.228627.117 (PMC5991514; doi:10.1101/gr.228627.117), 2018-06

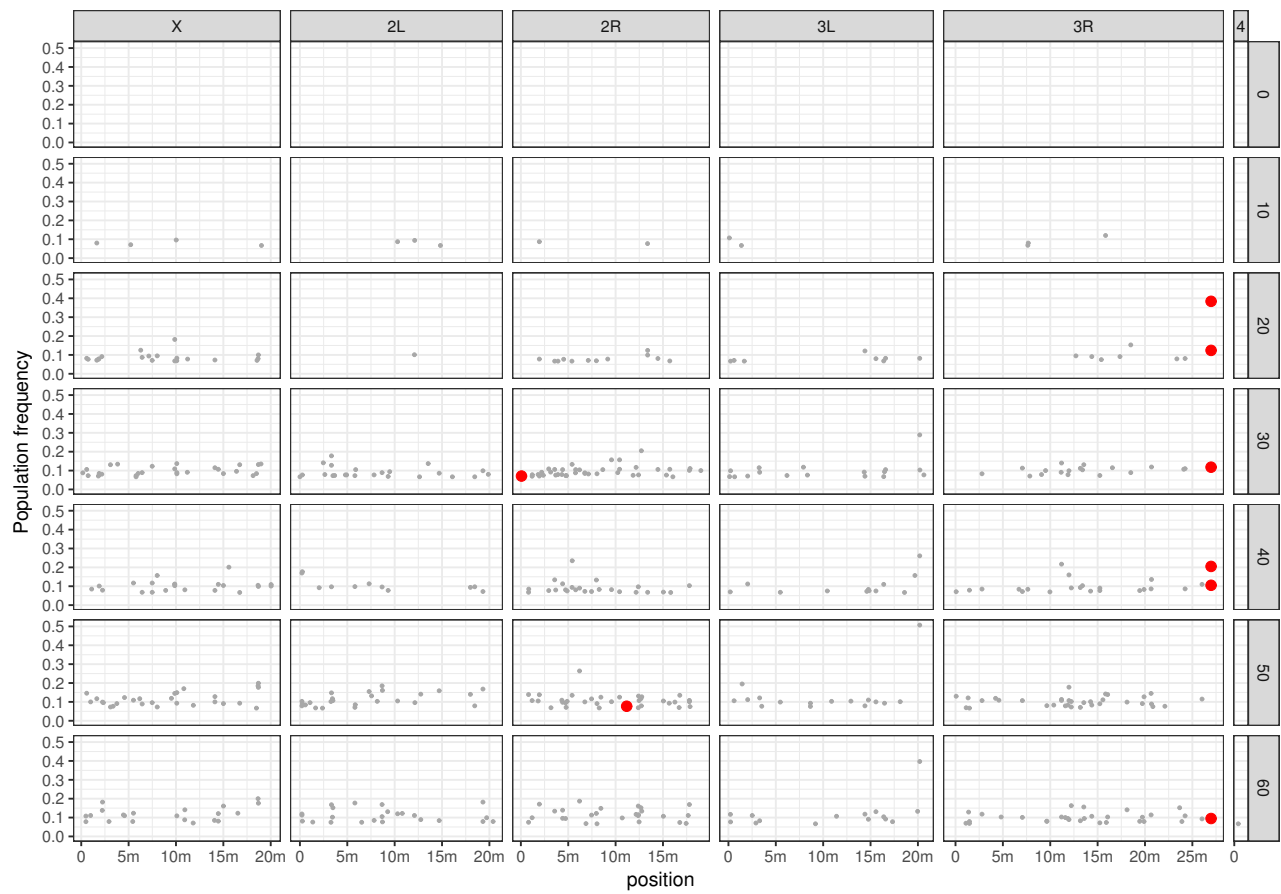

Supplementary Fig. 2: P-element invasion in hot replicate 3. For details see fig. 1.

Supplement: supp_gr.228627.117_Supplementary_Fig_S2.pdf [file supp_gr.228627.117_Supplementary_Fig_S2.pdf]

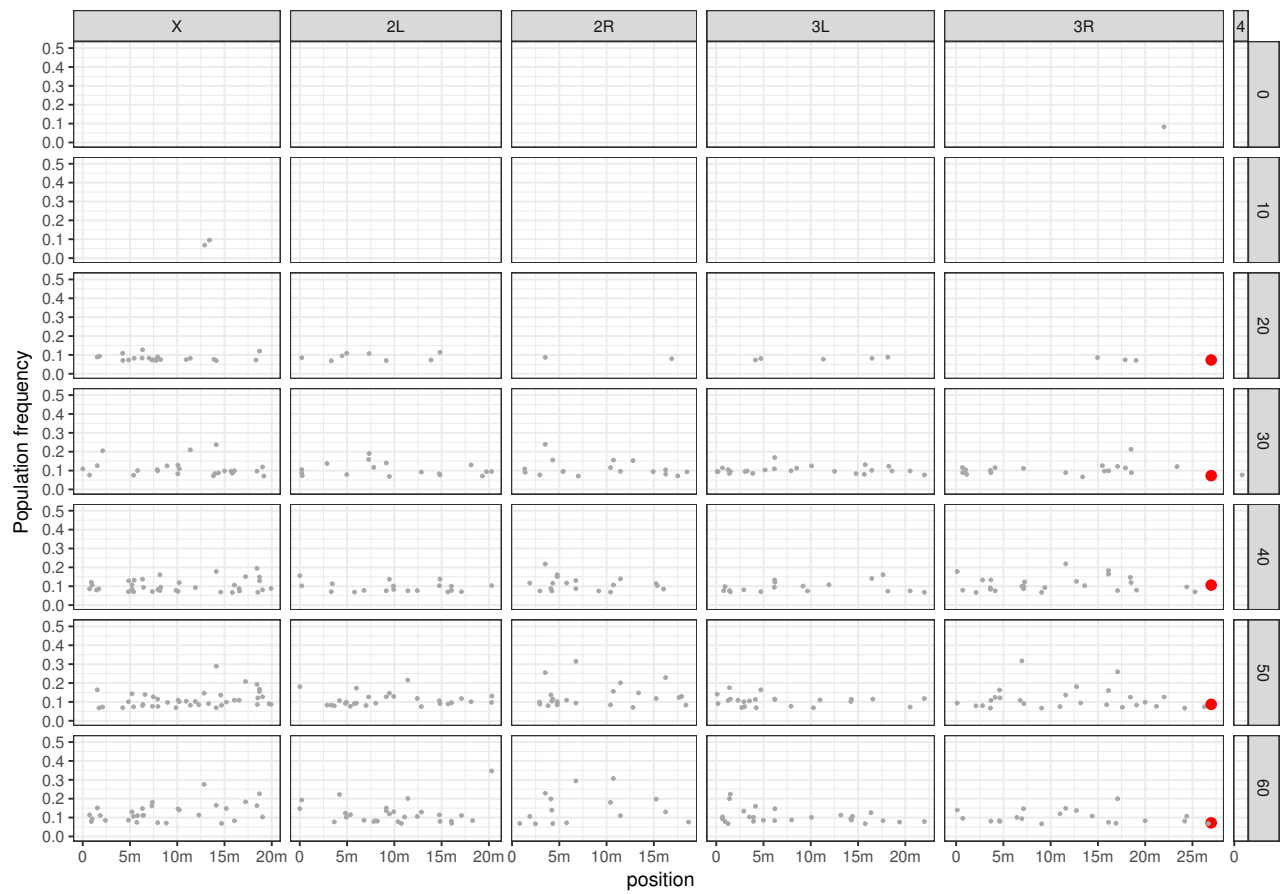

Supplementary Fig. 3: P-element invasion in hot replicate 5. For details see fig. 1.

Supplement: supp_gr.228627.117_Supplementary_Fig_S3.pdf [file supp_gr.228627.117_Supplementary_Fig_S3.pdf]

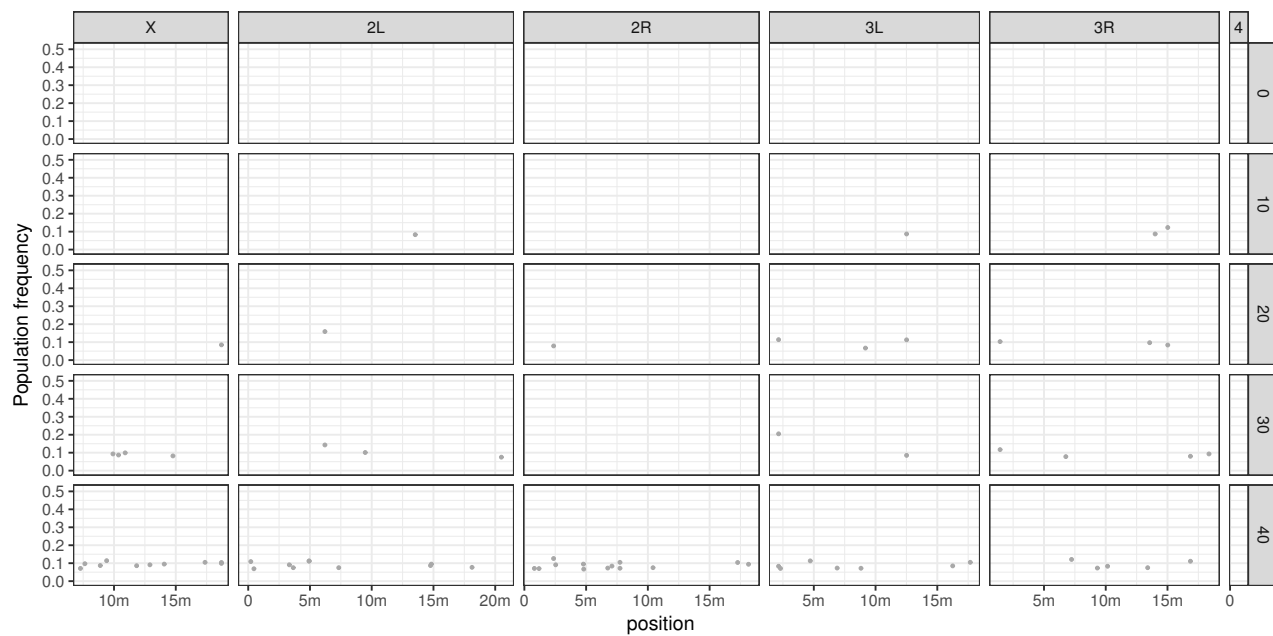

Supplementary Fig. 4: P-element invasion in cold replicate 1. For details see fig. 1.

Supplement: supp_gr.228627.117_Supplementary_Fig_S4.pdf [file supp_gr.228627.117_Supplementary_Fig_S4.pdf]
